# Supplementary material
Source: Research Square preprint supplement (doi:10.21203/rs.3.rs-9434079/v1)
Supplement: Supplementary file 1 [file ce44e3377c75e51c4b86c8e1.pdf]

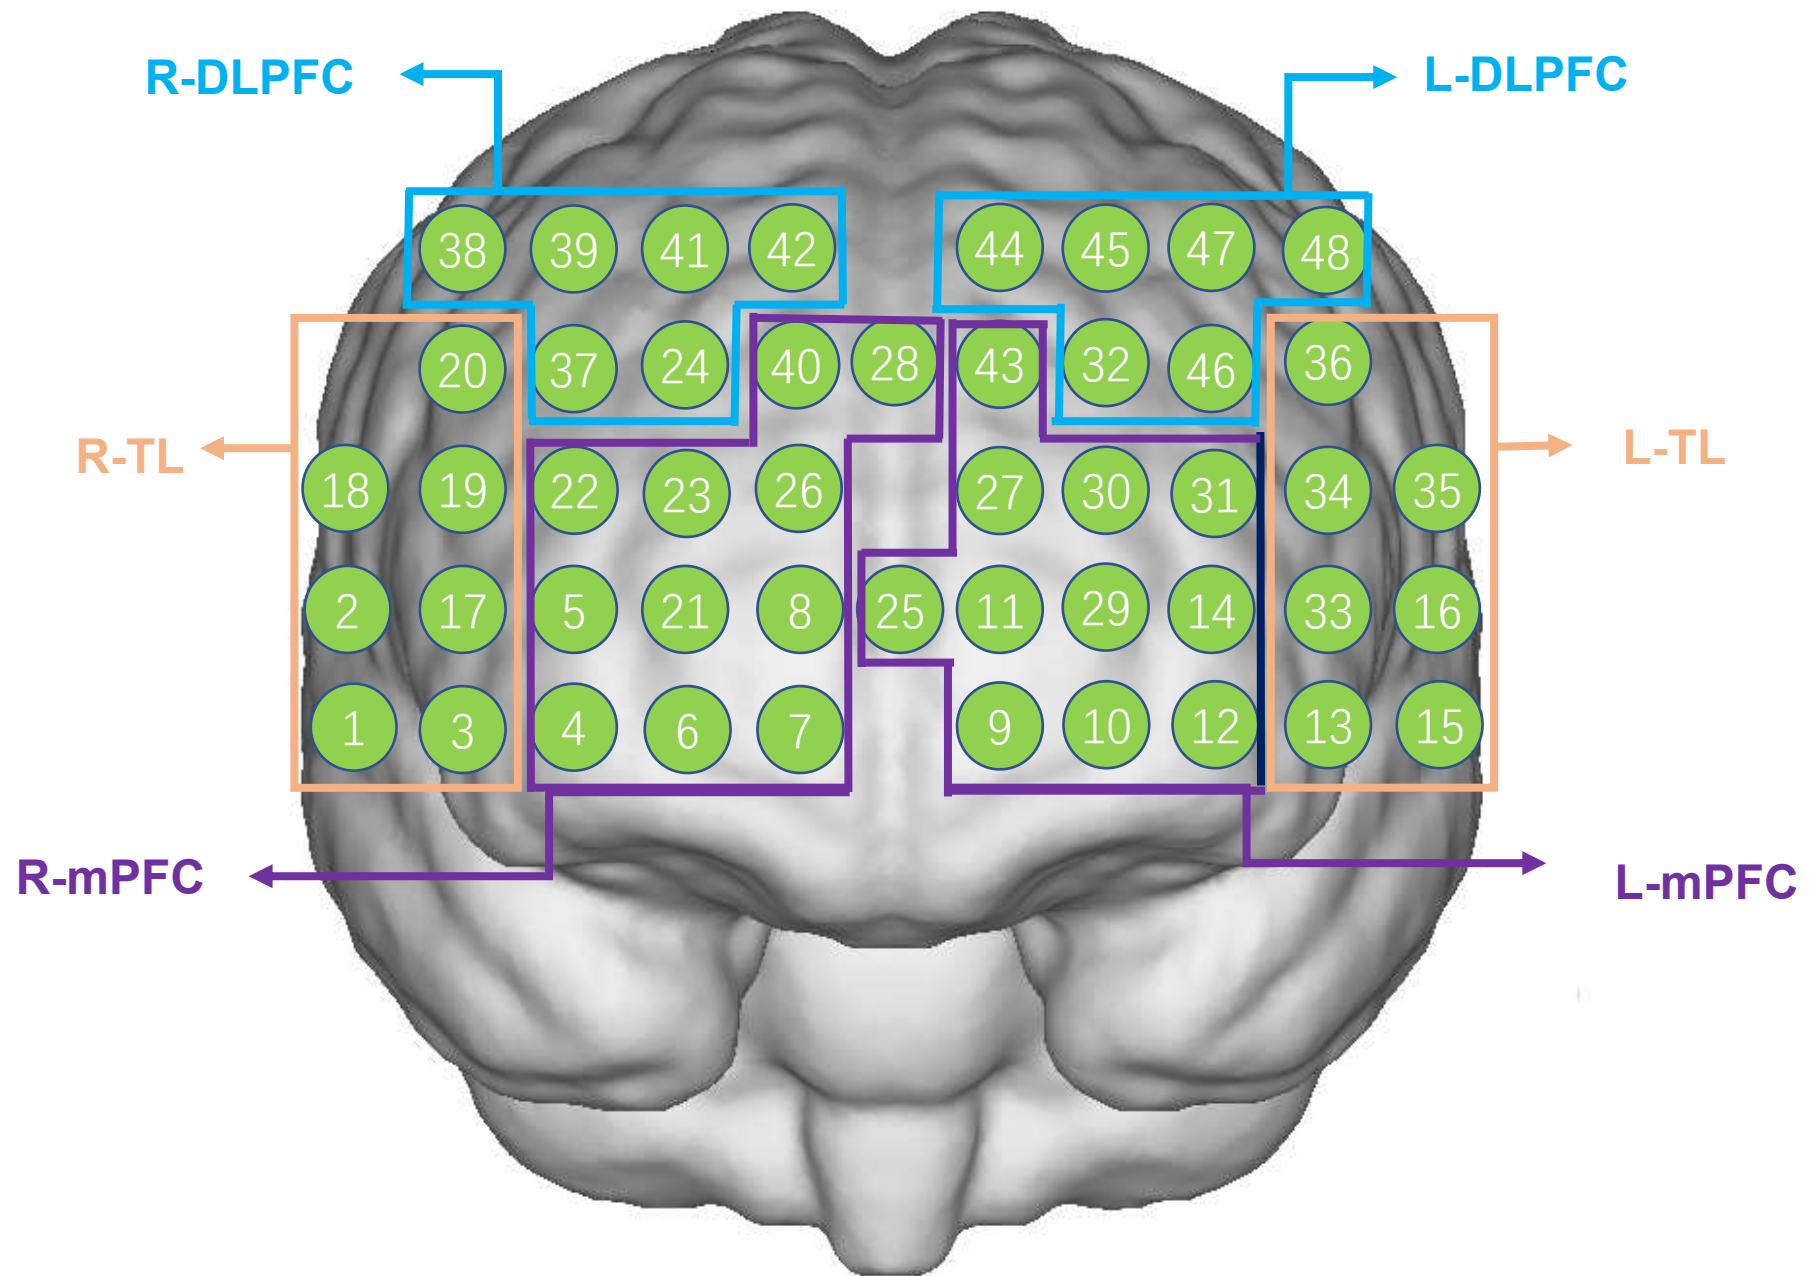

Supplementary materials 1: Schematic of arrangement of fNIRS channels.

DLPFC=dorsolateral prefrontal cortex; mPFC=medial prefrontal cortex; TL=temporal lobe ; R=right; L=left
